# Supplementary material for: Neuromuscular exercise reduces severe multisite pain among health care workers with recurrent low back pain
Source: Research Square preprint supplement (doi:10.21203/rs.3.rs-3465731/v1), 2023-10-31
Supplement: Supplementary file 1 [file 1dc223e066b8dbd290ae85cc.docx]

**Table 1.** Background characteristics of participants who had severe multisite pain

­­­­­­­­__________________________________________________________________

**No severe multisite pain Severe multisite pain p*** **n=165 n=50**

**mean (SD) mean (SD)**    

Age, years 46.8 (6.9) 45.1 (6.7) 0.127

Depressive symptoms

  PHQ-9-mFin**   7.1 (4.6) 8.5 (4.8) 0.080

summary score

**Classified variables n (%) n (%)**

Education level low 43(26.4) 15(30.0) 0.381

Marital status single 59(35.8) 17(34.0) 0.820

Smoker 44(26.7) 16(32.0) 0.461

Obese, BMI 30 or more 27(16.5) 10(20.8) 0.697

Hormonal status,

using HRT/menopause*** 78(47.3) 18(36) 0.160

Perceived health at least

moderate    51(31.1) 29(58.0) <0.001

Works shifts 113(68.9) 37 (74.0) 0.491

**_____________________________________________________________________**

* p (independent samples t-test for continuous variables and chi square test for categorical variables)

**modified Finnish version of the 9-item patient health questionnaire (PHQ-9-mFIN), sum score from 9 questions on the scale 0-27; no symptoms (score 0-4), mild symptoms (score 5-9), at least moderate symptoms (score 10 or over) Suni 2021

*** HRT hormone replacing therapy, menopause: stopped menstruating

**Table 2. The occurrence of severe multisite pain**

**_____________________________________________________________________**

**Baseline** **6 months** **12 months** **24 months**

n=215 n=174 n=164 n=146

**_____________________________________________________________________**  n (%) n (%) n (%) n (%)

Control No severe multisite pain 87 (80.6) 67(76.1) 64 (80.0) 51(70.8)

Severe multisite pain* 21 (19.4) 21(23.9) 16 (20.0) 21 (29.2)

Exercise No severe multisite pain 78 (72.9) 78(90.7) 70 (83.3) 56 (75.7)

Severe multisite pain* 29 (27.1) 8 (9.3) 14 (16.7) 18(24.3)

Total No severe multisite pain 165 (76.7) 145(8.3) 134 (81.7) 107 (73.3)

Severe multisite pain* 50 (23.3) 29 (16.7) 30 (18.3) 39 (26.7)

**___________________________________________________________________**

* *Severe multisite pain* (NRS >=4, pain daily or nearly daily, and at least 3 pain sites)

Adjustments: 6-minute walk test, modified push-up test
